# Supplementary material for: Glycolytic flux control by drugging phosphoglycolate phosphatase
Source: PubMed Central journal article supplement (PMC9652372; doi:10.1038/s41467-022-34228-2), 2022-11-11
Supplement: 41467_2022_34228_MOESM4_ESM.pdf [file 41467_2022_34228_MOESM4_ESM.pdf]

## **Description of Additional Supplementary Files**

File name: Supplementary Movie 1 (related to Supplementary Figure 13).

Description: Movie illustrating the movements along the first principal component (PC1) for apo-PGP.

File name: Supplementary Movie 2 (related to Supplementary Figure 13).

Description: Movie illustrating the movements along the second principal component (PC2) for apo-PGP.

File name: Supplementary Movie 3 (related to Supplementary Figure 13).

Description: Movie illustrating the movements along the first principal component (PC1) for CP1-PGP.

File name: Supplementary Movie 4 (related to Supplementary Figure 13).

Description: Movie illustrating the movements along the second principal component (PC2) for CP1-PGP.
